# Supplementary material for: The potential of Second Life for university counseling: a comparative approach examining media features and counseling problems
Source: Res Pract Technol Enhanc Learn. 2017 Dec 13;12(1):24. doi: 10.1186/s41039-017-0064-6 (PMC6294205; doi:10.1186/s41039-017-0064-6)
Supplement: Supplementary file 1 — Dataset for the two proposed research questions. (XLSX 68 kb) [file 41039_2017_64_MOESM1_ESM.xlsx]

## Sheet: Dataset
A_ID	A_1_gender	A_2_AP	A_2_grade	B_1_1_FA	B_1_1_WEB	B_1_1_SL	B_1_2_FA	B_1_2_WEB	B_1_2_SL	B_1_3_FA	B_1_3_WEB	B_1_3_SL	B_1_4_FA	B_1_4_WEB	B_1_4_SL	B_1_5_FA	B_1_5_WEB	B_1_5_SL	B_1_6_FA	B_1_6_WEB	B_1_6_SL	B_1_7_FA	B_1_7_WEB	B_1_7_SL	B_2_1_FA	B_2_1_WEB	B_2_1_SL	B_2_2_FA	B_2_2_WEB	B_2_2_SL	B_2_3_FA	B_2_3_WEB	B_2_3_SL	B_2_4_FA	B_2_4_WEB	B_2_4_SL	B_2_5_FA	B_2_5_WEB	B_2_5_SL	B_2_6_FA	B_2_6_WEB	B_2_6_SL	B_2_7_FA	B_2_7_WEB	B_2_7_SL	B_2_8_FA	B_2_8_WEB	B_2_8_SL	B_2_9_FA
ES1	2	3	2	2	0	0	2	0	0	2	0	0	2	0	0	2	0	0	2	0	0	2	0	0	5	5	5	5	5	5	5	5	5	5	5	5	5	5	5	5	5	5	5	5	5	5	5	5	5
ES2	1	3	999	1	0	2	2	0	0	2	0	0	2	0	0	1	0	2	2	0	0	2	0	0	2	8	8	8	8	5	6	3	6	9	3	5	3	7	7	2	8	8	4	4	4	3	3	8	6
ES3	1	3	2	2	0	0	2	0	0	2	0	0	2	0	0	0	2	0	2	0	0	0	2	0	2	8	8	9	2	9	4	9	9	9	5	4	1	9	9	3	9	9	3	9	9	9	5	6	9
ES4	1	3	1	1	0	1	0	1	1	0	2	0	0	1	1	2	0	0	1	0	1	0	2	0	1	8	9	9	3	9	8	8	9	9	4	7	3	8	7	3	8	8	4	7	7	5	3	8	7
ES5	1	3	3	0	2	0	0	2	0	0	2	0	0	2	0	0	2	0	0	2	0	0	2	0	1	1	1	1	1	1	1	1	1	1	1	1	1	1	1	1	1	1	1	1	1	1	1	1	1
ES6	1	3	3	2	0	0	2	0	0	2	0	0	2	0	0	2	0	0	2	0	0	2	0	0	4	5	4	999	5	5	6	6	4	4	4	5	4	5	5	5	4	4	5	5	5	5	6	5	5
ES7	1	3	3	0	2	0	0	2	1	0	2	0	0	2	0	0	2	0	0	2	0	2	0	0	2	5	5	9	2	4	7	5	5	9	3	5	2	7	7	2	6	6	2	7	7	1	3	7	8
ES8	1	3	3	2	1	0	2	1	0	1	2	0	1	2	0	1	2	0	2	1	0	1	2	0	1	8	8	8	2	8	8	2	6	9	2	3	8	4	5	8	3	2	8	2	2	8	2	6	9
ES9	1	3	1	1	2	0	1	2	0	1	2	0	1	2	0	1	2	0	1	2	0	1	2	0	1	9	9	5	5	5	5	9	9	9	7	9	3	6	5	3	4	5	2	6	5	4	5	6	4
ES10	1	3	1	2	0	0	0	2	0	2	0	0	0	2	1	2	0	0	1	1	0	0	2	1	2	9	9	9	5	9	9	9	9	9	5	9	1	9	9	1	9	9	5	7	7	3	5	5	3
ES11	1	3	1	2	0	0	2	0	0	2	0	0	2	0	0	2	0	0	2	0	0	2	0	0	4	5	6	6	5	4	4	5	6	6	5	4	4	5	6	6	5	4	4	5	6	6	5	4	4
ES12	1	3	1	0	2	0	2	0	0	2	0	0	2	0	0	0	2	0	0	2	0	0	2	0	1	9	9	9	1	1	9	1	1	9	1	1	4	9	9	2	8	7	9	9	9	9	1	1	9
ES13	1	3	1	2	0	0	2	0	0	2	0	0	2	0	0	2	0	0	0	2	0	0	2	0	2	4	6	2	1	5	5	1	5	9	5	5	1	2	9	1	5	9	8	2	8	5	2	9	2
ES14	1	3	1	2	0	0	0	0	2	2	0	0	2	0	0	2	0	0	2	0	0	2	0	0	6	8	9	4	5	7	4	7	8	7	6	5	7	7	7	5	7	9	6	7	8	5	5	7	3
ES15	1	3	1	2	0	0	2	0	0	2	0	0	2	0	0	2	0	0	2	0	0	2	0	0	3	3	3	5	1	1	9	1	1	6	2	2	3	7	7	7	7	7	3	8	9	3	3	3	5
ES16	1	3	1	2	0	0	2	0	0	2	0	0	2	0	0	2	0	0	2	0	0	2	0	0	5	9	9	7	6	9	3	6	9	9	5	5	2	5	9	2	9	9	2	8	8	5	5	9	9
ES17	2	3	2	2	0	1	0	2	1	2	0	1	0	2	1	2	0	1	0	2	1	0	2	1	1	5	9	9	2	9	9	2	5	9	1	5	9	9	9	9	9	9	5	8	9	2	8	9	7
ES18	2	3	1	2	0	0	2	0	0	2	0	0	2	0	0	2	0	0	2	0	0	0	0	2	2	3	5	5	5	3	3	3	5	7	5	3	3	5	6	3	5	6	2	2	2	2	3	5	2
ES19	2	3	1	2	0	0	2	0	0	2	0	0	2	0	0	0	2	0	2	0	0	0	2	0	4	5	5	8	3	8	3	5	8	8	3	4	7	6	7	7	6	6	6	8	8	6	6	8	7
ES20	2	3	1	2	1	1	2	1	1	1	2	1	1	1	2	1	2	1	2	1	1	0	1	2	1	7	7	9	1	7	5	5	5	9	1	6	7	7	7	4	7	7	6	8	8	3	3	5	7
ES21	1	3	1	2	0	0	2	0	0	2	0	0	2	0	0	2	0	0	2	0	0	2	0	0	3	6	7	2	1	8	3	7	7	9	1	8	5	9	8	3	5	9	5	9	6	6	7	8	5
ES22	1	3	1	1	2	0	0	2	1	1	2	0	0	2	1	1	2	0	1	2	0	0	2	1	3	9	5	3	9	9	8	7	9	9	7	8	6	9	8	4	9	9	4	4	9	7	9	9	6
ES23	1	3	1	1	2	0	1	2	0	2	1	0	2	1	0	1	2	0	2	1	0	1	2	0	1	8	7	2	6	9	3	5	6	8	4	5	3	7	7	2	7	7	7	5	5	4	6	6	6
ES24	1	3	1	2	1	0	2	0	1	0	2	0	2	0	0	2	0	0	1	1	2	0	1	1	3	5	7	6	1	8	3	5	7	8	1	6	3	8	9	4	6	8	5	2	7	6	3	7	5
ES25	1	3	1	2	0	0	0	2	0	2	0	0	2	0	0	2	0	0	2	0	0	0	2	0	1	6	4	3	4	7	4	6	8	6	4	5	2	6	6	2	5	7	3	7	8	5	5	9	4
ES26	1	3	1	2	0	0	2	0	1	2	1	0	2	1	0	2	0	1	2	1	0	2	0	1	7	9	8	8	7	9	6	7	9	9	4	5	4	9	8	6	7	8	9	6	8	6	7	9	9
ES27	2	8	2	2	0	0	2	0	0	2	1	0	2	0	0	2	1	0	2	1	0	2	0	1	8	2	2	9	7	7	5	8	6	9	1	9	4	7	7	8	8	8	9	2	2	6	9	9	9
ES28	1	3	1	2	0	0	2	1	0	2	0	0	2	0	0	2	0	0	2	0	0	2	0	0	2	7	9	3	3	8	6	3	8	9	8	8	3	7	9	4	9	9	9	9	9	4	6	9	3
ES29	1	3	1	2	0	0	0	2	0	2	0	0	0	2	0	0	2	0	0	2	0	0	2	0	5	7	7	8	1	6	6	5	7	9	5	7	3	9	7	5	9	8	8	5	7	5	9	8	7
ES30	1	3	1	2	0	0	0	0	2	2	0	0	0	0	2	0	2	0	2	0	0	0	0	2	2	6	7	5	2	7	4	5	2	8	2	2	3	4	7	4	2	4	6	5	8	6	5	3	4
ES31	1	3	1	2	0	0	2	0	0	2	0	0	2	0	0	2	0	0	2	0	0	2	0	0	6	7	8	5	5	8	5	8	8	8	5	5	6	8	8	7	6	5	7	8	8	5	6	8	7
ES32	1	3	1	2	1	0	0	2	1	2	0	0	0	1	2	2	0	0	2	0	0	0	2	1	2	8	8	8	2	6	3	6	8	9	3	6	4	8	8	4	8	7	6	7	7	2	6	8	4
ES33	1	3	1	0	1	2	2	0	0	0	2	0	1	0	1	0	2	0	2	0	0	2	0	0	9	4	7	8	7	8	5	7	7	9	1	5	3	7	7	4	7	9	6	3	5	4	7	7	6
ES34	1	3	1	2	0	0	0	2	0	2	0	0	0	2	0	2	0	0	0	2	0	2	0	0	1	9	5	9	1	7	7	3	8	9	4	7	4	8	9	5	9	9	5	9	9	7	9	9	9
ES35	1	3	1	1	2	1	0	2	1	0	2	1	0	2	1	0	2	1	0	2	1	0	2	1	4	7	6	6	2	7	3	2	5	6	3	6	3	7	5	3	7	7	5	7	7	3	7	7	5
ES36	2	3	1	2	0	0	0	2	0	2	0	0	2	0	0	0	2	0	0	2	0	0	2	0	4	6	6	6	3	9	4	4	7	7	4	5	5	6	7	5	7	7	4	5	5	5	6	7	6
ES37	1	3	1	2	0	0	0	2	0	2	0	0	0	0	2	0	2	0	0	2	0	0	0	2	1	6	8	9	5	9	3	3	3	9	4	5	3	8	6	3	9	9	9	9	9	4	3	4	7
ES38	1	3	1	2	1	1	2	1	1	2	1	1	2	1	1	1	1	1	1	1	1	0	1	2	1	9	8	8	1	4	7	1	7	9	1	6	4	7	7	4	5	7	6	6	6	3	4	5	5
ES39	1	3	1	2	0	0	2	0	0	2	1	0	2	1	0	1	2	1	2	0	0	1	2	1	2	8	8	3	3	8	7	8	7	9	2	7	4	8	8	4	9	9	4	8	9	4	2	9	8
ES40	1	3	1	1	0	2	2	1	0	2	1	0	0	1	2	0	0	2	0	1	2	0	2	1	3	8	8	7	8	8	7	7	7	8	3	6	6	7	8	6	8	8	7	8	9	4	4	6	4
ES41	1	3	1	1	2	0	1	2	0	1	2	0	1	2	0	1	2	0	1	2	0	1	2	0	1	9	9	3	2	9	3	3	7	9	1	5	5	8	8	5	9	9	5	5	9	8	7	9	9
ES42	1	3	1	2	0	0	2	0	0	2	0	0	2	0	0	2	0	0	2	0	0	2	0	0	2	8	8	6	6	6	5	5	5	9	5	5	5	8	8	3	7	7	2	5	5	1	4	6	2
ES43	1	3	1	2	0	0	0	1	2	2	0	0	2	0	0	0	1	2	0	1	2	0	1	2	2	7	9	2	3	9	2	3	7	8	3	3	2	8	8	2	8	8	2	9	9	2	5	7	1
ES44	1	3	1	2	0	0	2	0	0	2	0	0	2	0	0	2	0	0	2	0	0	2	0	0	4	8	8	5	3	8	6	6	6	9	4	4	3	6	8	3	8	8	6	8	8	4	4	7	5
ES45	1	3	1	2	0	0	2	0	1	2	0	0	0	1	2	2	0	0	2	0	0	0	2	0	1	5	4	6	1	8	3	1	5	7	1	5	5	3	7	3	6	6	6	3	4	4	6	8	6
ES46	1	3	1	2	1	0	0	2	0	2	1	0	2	1	0	1	2	0	2	1	0	2	1	0	3	7	7	3	7	7	3	7	7	8	3	3	4	8	8	3	8	8	4	5	5	2	8	8	3
ES47	1	3	1	2	1	1	0	1	1	2	0	0	2	1	1	2	0	0	0	1	1	0	1	1	1	5	9	5	1	9	9	9	9	9	1	5	5	9	9	5	9	9	5	9	9	5	1	9	5
ES48	1	3	1	2	1	0	2	1	0	2	1	0	1	2	0	1	2	0	2	1	0	1	2	0	8	6	7	6	8	8	8	8	8	8	3	3	5	4	4	4	5	6	9	6	5	6	6	8	6
ES49	1	3	1	0	0	2	0	0	2	0	0	2	0	0	2	0	0	2	0	0	2	0	0	2	2	8	8	3	8	8	2	8	8	3	6	8	3	8	8	3	8	8	5	8	8	3	6	8	8
ES50	1	3	1	2	0	0	0	2	1	2	1	0	1	1	2	1	2	1	1	2	1	0	1	2	1	8	8	8	1	6	4	5	6	9	1	3	1	9	9	3	6	6	1	9	9	1	9	9	5
ES51	1	3	1	2	0	0	2	1	1	2	0	1	2	1	1	2	1	1	2	0	1	2	1	1	8	7	7	3	1	8	7	1	6	9	1	4	3	9	6	7	4	8	9	7	8	8	3	8	9
ES52	1	3	1	2	0	0	1	0	2	2	0	0	2	0	0	0	2	0	2	0	0	0	0	2	1	6	8	2	3	9	1	2	8	9	1	3	7	7	7	4	8	8	7	9	9	5	2	8	5
ES53	1	3	1	0	2	0	0	2	0	0	2	0	0	2	0	0	2	0	0	2	0	0	2	0	1	5	7	1	5	7	5	5	5	5	5	5	5	5	5	5	5	5	5	5	5	5	5	5	5
ES54	1	3	1	1	2	0	2	0	0	2	0	0	2	1	0	0	2	0	2	1	0	2	0	0	6	5	5	5	4	7	4	4	7	9	5	6	6	5	6	6	7	8	7	7	7	7	5	6	8
ES55	2	3	2	2	1	1	1	2	1	2	1	1	2	1	1	1	2	1	2	1	1	1	2	1	7	9	9	1	1	9	8	5	8	9	1	5	7	9	9	7	9	9	9	9	9	5	5	9	9
ES56	1	3	1	2	0	0	0	0	2	2	0	0	2	0	0	0	0	2	0	2	0	0	0	2	1	9	9	1	1	9	1	9	9	9	1	1	1	9	9	1	9	9	9	9	9	1	9	9	1
ES57	1	3	2	2	1	0	2	1	0	2	1	0	2	1	0	2	1	0	2	1	0	2	1	0	7	8	8	5	5	8	7	5	5	8	6	6	7	8	8	7	8	8	8	8	8	7	8	8	8
ES58	2	3	1	2	1	1	1	2	1	1	2	1	2	1	1	1	2	1	1	2	1	1	2	1	1	7	7	1	6	9	9	9	9	9	4	7	7	9	9	5	2	5	7	9	9	2	5	6	5
ES59	1	3	2	2	0	0	2	0	0	2	0	0	2	0	0	2	0	0	2	0	0	2	0	0	7	6	8	8	4	4	5	5	5	8	5	4	4	5	6	5	6	6	6	7	7	5	4	5	6
ES60	1	3	2	2	1	1	0	2	0	2	1	1	2	0	1	2	0	0	0	1	2	0	0	2	2	5	8	6	4	9	5	3	8	9	2	7	6	7	8	4	6	9	2	6	8	3	6	9	6
ES61	1	3	1	2	1	0	2	1	0	2	1	0	2	0	0	2	0	0	2	1	0	0	2	0	6	7	7	6	3	8	5	3	6	9	5	7	4	7	7	5	7	8	7	5	7	3	5	7	7
ES62	1	3	1	2	0	1	2	0	1	2	0	1	2	0	1	2	0	1	2	0	1	2	0	1	7	9	7	9	1	8	8	1	6	9	1	5	6	7	7	4	9	9	7	9	9	9	6	6	8
ES63	1	3	1	2	1	0	1	0	2	2	0	0	1	0	2	2	1	1	2	0	1	0	1	2	1	7	9	8	2	9	8	6	8	9	3	6	7	9	7	7	2	8	8	7	9	5	3	8	4
ES64	1	3	1	2	0	0	2	1	0	2	0	0	2	0	0	2	0	0	2	0	0	2	1	0	1	8	8	8	2	7	8	3	6	9	4	6	4	7	8	4	8	8	7	8	8	6	3	8	7
ES65	1	3	1	2	0	0	2	0	0	2	0	0	2	0	0	2	0	0	2	0	0	0	2	0	1	5	9	9	1	9	9	9	9	9	3	7	7	9	9	5	2	5	7	5	7	8	2	6	9
ES66	1	3	1	2	0	0	2	0	0	2	1	1	2	1	1	2	1	0	2	1	0	2	1	0	9	6	7	9	6	8	8	6	8	9	5	5	6	6	6	9	7	7	9	5	5	5	7	9	5
ES67	1	3	1	2	1	0	2	1	0	2	1	1	2	1	1	2	1	2	2	1	2	2	1	2	3	7	7	3	1	9	4	1	6	9	1	6	1	3	6	1	2	3	8	1	6	1	3	6	1
ES68	1	3	1	1	2	1	2	1	1	1	1	2	1	1	2	2	1	1	2	1	1	1	1	2	4	8	8	9	8	8	5	7	7	9	4	4	4	9	9	4	6	6	4	8	8	4	6	6	6
ES69	1	999	1	2	1	1	2	1	1	2	1	1	2	1	1	1	2	1	1	2	1	1	2	1	2	9	9	2	7	9	4	7	8	9	6	8	6	9	9	4	9	9	8	2	2	1	1	9	3
PO1	1	8	3	2	0	0	2	0	0	2	0	0	2	0	0	2	0	0	2	0	0	2	0	0	5	2	4	2	2	2	7	3	3	8	2	2	5	8	4	8	4	4	5	3	3	6	4	5	7
PO2	2	8	3	2	1	0	2	0	0	2	1	1	0	2	1	0	2	1	2	1	0	0	2	1	3	7	6	9	3	6	5	2	6	9	3	5	2	6	6	3	6	6	3	7	7	3	5	6	4
PO3	2	8	3	2	0	0	0	0	2	2	0	0	0	1	2	0	1	2	2	0	0	0	2	1	5	3	4	5	3	8	3	3	8	8	2	7	3	7	8	3	7	8	7	4	6	3	3	8	5
PO4	1	8	3	2	0	1	0	1	2	1	2	1	2	0	1	1	2	1	2	0	1	0	1	2	7	8	9	8	1	6	3	6	7	9	2	7	6	7	7	3	2	5	7	7	7	4	7	6	5
PO5	1	8	3	2	0	0	2	0	0	2	0	0	2	0	0	2	0	0	2	0	0	2	0	0	7	8	8	3	8	8	2	2	8	8	2	4	4	8	8	4	8	8	4	8	8	2	8	8	4
PO6	1	8	3	2	0	0	1	0	1	2	0	0	2	0	0	1	0	1	2	0	0	1	0	1	3	9	9	9	2	2	4	7	8	9	1	4	4	5	7	2	5	9	8	7	8	2	3	7	5
PO7	1	8	3	1	2	1	2	0	0	1	2	1	2	0	0	2	0	0	1	2	1	1	2	1	3	8	6	4	1	8	3	6	6	8	2	4	2	5	5	2	6	6	2	6	8	2	4	7	3
PO8	1	8	3	2	1	0	0	2	1	2	1	0	0	1	2	0	2	0	0	2	1	0	2	1	2	9	8	9	1	7	9	9	9	9	1	6	3	9	8	5	9	9	9	9	9	9	5	9	7
PO9	1	8	3	2	0	0	0	2	0	2	0	0	2	1	0	2	1	0	2	1	0	0	2	1	3	8	7	7	1	9	2	3	8	9	2	7	2	6	7	3	7	7	4	6	7	3	2	6	7
PO10	2	8	3	2	1	1	0	1	2	2	1	1	1	1	2	0	2	1	2	1	1	0	1	2	2	9	8	9	5	8	4	6	7	9	5	6	6	8	8	3	8	8	9	9	9	4	4	8	9
PO11	1	8	3	1	1	1	2	0	0	1	1	1	1	1	1	1	1	1	2	0	0	2	0	0	6	8	8	5	5	9	5	6	9	9	4	6	6	9	8	6	8	8	8	8	8	7	6	9	6
PO12	1	8	3	2	0	0	0	2	0	2	0	0	2	0	0	0	2	0	2	0	0	0	0	2	1	7	8	3	5	7	4	7	7	7	7	7	4	7	7	4	8	8	6	7	7	5	8	9	5
PO13	1	8	3	1	1	1	0	2	0	0	2	0	0	0	2	0	2	0	0	2	0	0	1	1	2	8	6	7	7	8	8	3	7	9	3	6	3	9	7	4	8	7	8	8	8	4	7	8	5
PO14	2	8	3	0	2	0	2	0	0	0	2	0	2	0	0	0	2	0	2	0	0	2	0	0	3	5	7	3	7	7	2	5	5	8	5	2	5	5	3	5	5	5	7	5	7	3	4	5	6
PO15	2	8	3	2	0	1	2	0	0	2	1	0	0	1	2	1	2	1	2	0	1	2	0	1	3	5	7	7	2	6	4	3	6	8	3	6	5	8	7	3	8	8	6	7	7	3	6	7	8
PO16	1	2	3	1	2	1	1	0	2	2	1	0	2	0	1	2	1	1	2	0	0	0	1	2	3	5	5	6	3	8	2	3	7	9	3	6	6	8	7	3	8	7	4	8	6	3	3	7	5
PO17	2	8	3	2	0	0	0	1	2	0	2	0	2	0	0	0	2	0	0	2	1	0	1	2	1	8	6	7	8	8	3	6	6	8	2	3	2	5	5	2	7	7	5	7	7	2	7	7	6
PO18	1	8	3	2	0	0	0	2	0	1	1	0	1	1	0	1	1	0	2	0	0	0	2	0	2	8	7	3	2	7	8	8	6	9	7	7	3	5	4	4	7	5	6	6	5	4	7	5	3
PO19	2	8	3	2	0	0	0	2	0	0	2	0	2	0	0	0	2	0	0	0	2	0	2	0	2	9	8	9	2	9	7	8	1	9	1	5	3	9	6	2	9	9	3	8	8	2	4	8	8
PO20	1	8	3	2	1	0	2	1	0	1	2	0	2	1	0	1	2	0	2	1	0	1	2	0	3	9	9	9	1	6	7	7	7	9	3	5	4	8	8	4	8	7	7	9	9	5	1	6	9
PO21	1	8	3	2	0	0	0	2	0	2	0	0	0	2	0	0	2	0	2	0	0	0	2	0	2	7	6	7	3	6	6	4	6	7	2	6	7	7	7	2	7	7	7	6	6	7	7	8	7
PO22	2	8	3	1	2	1	0	1	2	2	1	1	0	0	2	1	2	0	2	1	0	0	1	2	2	8	8	8	8	8	2	2	6	9	2	6	6	7	8	2	9	8	6	3	7	2	9	8	2
PO23	2	8	3	1	2	1	0	1	2	0	2	1	0	2	1	2	1	1	0	1	2	0	2	1	2	8	8	5	2	6	5	6	6	9	2	3	3	7	6	4	7	8	6	6	6	4	5	6	5
PO24	2	8	3	1	2	0	0	1	2	2	1	0	1	0	2	0	2	1	0	1	2	0	1	2	6	8	8	3	6	9	2	5	7	8	2	6	4	7	8	4	8	8	6	8	8	4	6	9	8
PO25	2	8	3	2	1	0	1	0	2	1	2	0	2	0	0	2	1	1	1	0	2	1	1	2	3	6	9	9	2	7	3	5	7	9	4	6	3	6	8	3	9	8	9	4	6	2	5	9	9
PO26	1	8	3	2	1	1	2	1	1	2	1	1	2	1	1	2	1	1	2	1	1	1	1	2	2	7	7	7	2	7	6	2	6	7	2	5	5	7	6	3	7	7	7	3	7	4	7	6	5
PO27	2	8	3	1	1	2	2	1	0	1	1	2	2	1	0	2	0	0	2	0	1	0	1	2	3	9	9	1	8	9	4	2	8	9	2	5	2	9	9	2	9	9	7	9	9	1	1	8	7
PT1	1	8	1	2	0	0	2	0	0	2	0	0	2	0	0	2	0	0	2	0	0	2	0	0	3	8	8	9	4	4	9	6	5	9	3	4	3	7	7	3	5	5	5	5	5	7	7	6	8
PT2	2	8	1	0	2	0	0	2	0	2	0	0	0	2	0	1	2	0	0	2	0	0	2	0	2	9	7	1	5	9	8	8	8	9	3	9	4	9	9	3	9	9	5	8	8	5	7	7	5
PT3	2	8	1	0	2	0	0	2	0	2	0	0	0	2	0	2	0	0	0	2	0	0	2	0	3	7	6	2	9	7	9	2	2	9	1	1	4	8	8	4	7	7	4	7	7	4	9	9	9
PT4	2	8	1	2	0	0	0	0	2	2	0	0	2	0	0	0	0	2	2	0	0	0	0	2	7	9	9	6	9	9	5	3	7	9	4	6	4	5	8	4	9	9	8	9	9	7	9	9	8
PT5	1	3	3	2	0	0	2	1	0	2	1	0	2	0	0	2	0	0	2	0	0	2	0	0	1	5	5	9	1	6	9	7	7	9	1	6	5	7	5	7	1	4	7	7	7	4	4	7	7
PT6	2	8	1	2	1	0	0	2	0	2	0	0	0	0	2	0	2	1	2	0	0	0	1	2	1	6	8	3	5	9	6	4	6	9	4	7	4	9	8	4	9	6	8	5	3	7	5	8	8
PT7	2	8	1	2	1	1	1	2	1	2	1	1	2	1	1	2	1	1	1	2	1	0	2	1	3	5	4	8	3	9	4	8	2	9	2	7	3	9	8	2	5	9	6	8	9	5	6	8	7
PT8	2	8	1	1	2	0	0	0	2	2	0	0	2	0	1	0	0	2	2	0	1	0	1	2	6	8	9	9	5	6	5	7	3	9	3	6	5	6	7	6	8	8	6	7	8	6	4	8	8
PT9	1	8	1	2	0	0	0	2	1	2	0	0	2	0	0	1	2	1	2	0	0	0	2	1	1	9	7	7	1	9	1	1	4	9	1	1	4	9	6	1	9	9	7	5	7	3	9	9	9
PT10	2	8	1	2	0	1	0	1	2	2	1	1	0	1	2	0	1	2	1	1	2	0	1	2	4	5	6	1	9	9	5	7	7	9	5	5	5	9	9	5	9	9	5	9	9	5	4	9	9
PT11	2	8	1	2	0	1	0	1	2	0	2	1	0	1	2	0	2	0	1	1	2	0	2	1	6	8	7	8	4	6	8	7	7	9	3	3	6	7	7	6	9	9	7	7	7	5	6	9	8
PT12	1	8	1	2	0	0	2	0	0	0	2	0	0	2	0	1	2	0	1	2	0	1	2	0	6	7	4	5	2	9	3	4	8	9	2	5	3	7	7	3	6	6	6	6	6	2	2	8	5
PT13	2	8	1	2	0	1	1	0	2	1	2	0	0	1	2	2	1	1	2	1	1	0	1	2	6	7	6	9	1	7	3	2	4	9	2	6	2	9	9	2	9	9	6	6	6	4	5	7	7
PT14	2	8	1	2	1	0	2	1	0	999	999	999	2	0	0	2	0	0	2	0	0	0	2	0	3	8	8	6	1	8	6	8	8	9	1	8	3	6	9	6	9	9	7	9	9	6	7	9	6
PT15	2	8	2	1	2	0	1	2	0	1	2	0	2	0	1	1	2	1	1	2	1	0	2	1	3	9	8	9	1	9	7	9	2	9	1	9	7	9	9	3	9	9	3	9	9	5	9	9	9
PT16	2	8	1	2	1	1	1	2	1	2	1	1	1	2	1	2	1	1	1	2	1	1	2	1	1	7	9	5	3	9	7	6	4	9	5	5	5	7	7	3	5	5	9	5	7	3	5	5	5
PT17	2	3	3	2	0	0	2	0	0	2	0	0	2	1	0	2	0	0	2	0	0	2	1	0	3	6	7	9	9	2	5	7	5	9	5	1	5	6	6	7	8	8	6	6	7	6	6	7	8
PT18	2	8	1	2	0	0	0	1	2	0	2	0	0	1	2	0	2	0	0	1	2	2	0	1	3	9	7	9	1	6	8	1	7	9	1	4	4	7	8	4	7	7	5	8	8	4	7	8	3
PT19	1	8	1	1	2	0	0	2	0	2	1	1	0	1	2	0	1	2	1	2	1	0	2	1	5	8	7	8	2	5	4	3	6	8	4	6	5	9	8	3	7	8	5	8	8	5	3	7	7
PT20	2	8	1	2	1	0	2	1	0	2	1	1	1	1	2	1	2	0	2	1	1	1	2	1	3	8	8	2	5	8	7	7	7	9	2	4	5	7	6	4	5	6	5	6	8	4	6	8	9
EE1	1	3	3	2	0	0	2	0	0	2	0	0	2	0	0	2	0	0	2	0	0	2	0	0	3	4	5	1	1	7	1	1	7	9	1	3	5	9	9	3	9	9	9	9	9	4	6	9	9
EE2	1	3	2	2	0	0	0	2	0	2	0	0	2	0	0	2	0	0	2	0	0	0	2	0	3	6	6	5	3	8	3	7	1	9	6	6	3	7	7	4	9	9	4	7	7	4	7	7	5
EE3	1	3	3	2	0	0	2	0	0	2	0	0	2	0	0	2	0	0	2	0	0	2	0	0	1	9	6	4	1	7	5	2	8	8	1	8	5	5	9	3	5	8	5	4	8	1	1	7	4
EE4	2	7	1	2	0	0	2	0	0	2	0	0	2	0	0	2	0	0	2	0	0	2	0	0	4	7	9	4	7	9	9	5	5	9	5	5	7	9	9	6	8	9	5	8	9	7	8	9	7
EE5	2	7	1	2	0	0	2	0	0	2	0	0	2	0	0	2	0	0	2	0	0	2	0	0	2	6	8	2	6	9	2	6	8	8	5	5	3	8	8	3	8	8	3	8	8	2	9	9	3
EE6	1	4	3	2	0	0	2	0	0	2	0	0	2	0	0	2	0	0	2	0	0	2	0	0	1	9	9	5	5	5	5	5	5	9	1	1	5	9	9	5	9	9	5	5	5	5	5	5	9
EE7	2	3	2	2	0	0	0	0	2	2	0	0	0	0	2	2	0	0	2	0	0	0	0	2	1	9	9	9	6	7	4	1	2	9	1	5	3	7	9	6	4	7	8	3	5	6	2	7	8
EE8	2	3	2	0	2	1	0	1	2	2	1	1	1	2	0	1	1	2	0	1	2	0	2	1	2	9	5	9	3	7	1	1	6	9	3	9	3	9	9	3	9	9	3	5	3	2	4	9	9
EE9	1	3	2	2	0	0	2	0	0	2	0	0	2	0	0	2	0	0	2	0	0	2	0	0	7	8	8	4	1	9	4	1	7	9	1	5	4	4	8	4	4	9	5	9	9	5	5	9	5
EE10	2	7	2	2	0	0	0	0	2	2	0	0	2	0	0	2	0	0	0	0	2	0	0	2	6	7	8	5	4	8	7	6	8	8	6	6	4	6	6	6	7	8	4	4	7	6	5	7	6
EE11	2	3	2	2	0	0	1	1	0	1	1	0	2	0	0	2	0	0	1	1	0	2	0	0	1	7	7	9	7	4	9	6	8	9	3	9	4	7	9	4	9	9	3	7	9	3	6	9	3
EE12	1	3	2	2	0	0	0	2	0	2	0	0	2	0	0	2	0	0	2	0	0	0	2	0	4	8	5	8	9	4	6	8	8	7	5	6	5	5	5	8	8	9	8	8	8	7	8	9	7
EE13	2	3	2	2	0	0	2	0	0	2	0	0	2	0	0	2	0	0	2	0	0	2	0	0	8	6	5	5	5	5	6	5	5	7	5	5	6	7	7	6	6	6	6	8	8	7	8	8	6
EE14	2	3	2	2	0	0	0	2	0	2	0	0	2	0	0	2	0	0	2	0	0	0	2	0	5	5	5	5	5	5	5	5	5	6	5	5	5	6	6	5	6	6	5	6	6	5	5	5	5
EE15	1	3	3	2	0	0	1	0	1	2	0	0	2	0	0	2	0	0	2	0	0	0	0	2	3	9	9	9	1	6	8	8	6	9	2	7	3	7	7	2	9	9	6	6	6	9	3	7	7
EE16	1	7	2	2	0	0	2	0	0	2	0	0	0	0	2	2	0	0	2	0	0	0	0	2	2	4	8	4	3	8	4	4	7	8	6	3	3	5	8	4	5	9	7	7	7	7	6	8	6
EE17	1	2	4	2	0	0	0	2	0	2	0	0	2	0	0	0	2	0	0	2	0	0	2	0	3	5	5	5	3	5	3	2	6	6	3	5	3	3	5	3	6	6	4	3	5	3	4	6	4
EE18	2	1	3	2	0	0	0	0	2	2	0	0	2	0	0	2	0	0	2	0	0	2	0	0	1	5	8	2	4	8	9	9	9	9	6	6	8	8	8	7	8	8	6	9	9	6	5	8	9
EE19	1	2	2	2	0	1	1	0	2	1	2	0	2	0	1	1	1	2	1	0	2	0	1	2	1	6	5	8	2	7	7	7	7	9	3	7	3	8	7	8	8	8	5	7	6	7	6	7	8
EE20	1	4	2	2	1	1	2	1	0	0	2	1	1	2	1	0	1	2	2	0	1	0	1	2	1	6	6	9	3	4	4	5	5	8	4	5	3	6	6	5	2	7	4	9	9	3	1	7	9
EE21	2	7	1	2	0	0	0	0	2	2	0	0	0	0	2	0	0	2	0	0	2	0	0	2	3	9	9	8	5	8	7	5	9	9	1	6	4	4	8	4	9	9	5	9	9	3	3	9	4
EE23	2	7	1	2	1	0	0	1	2	2	1	0	2	1	1	0	2	1	1	2	0	0	1	2	3	5	8	2	5	9	5	3	8	6	2	5	3	5	7	2	6	8	6	4	8	3	6	8	5
EE24	1	4	999	2	0	0	2	0	0	2	0	0	2	0	0	2	0	0	2	0	0	0	2	0	1	2	7	2	5	7	7	7	3	8	4	4	5	5	8	4	7	7	4	7	8	5	5	7	4
EE25	1	4	2	1	2	0	0	1	2	2	1	0	0	2	0	0	1	2	0	1	2	0	2	0	3	8	6	7	9	1	7	9	8	8	1	6	3	9	7	6	9	7	3	7	7	6	6	9	7
EE26	2	3	2	1	2	1	1	1	2	1	2	1	1	1	2	1	2	1	1	1	2	1	1	2	1	6	6	2	1	7	2	6	8	3	5	8	2	6	8	2	6	8	2	6	8	2	6	8	2
EE27	1	3	3	2	0	0	0	0	2	2	0	0	2	0	0	0	0	2	0	0	2	0	0	2	4	7	9	3	3	9	2	7	9	9	4	7	4	6	7	5	7	7	6	7	7	3	9	9	4
EE28	1	3	1	2	0	0	2	1	0	2	0	0	0	1	2	2	0	0	2	1	0	0	1	2	3	5	8	4	2	8	9	1	8	9	3	3	5	8	9	5	5	9	6	3	8	4	3	8	7
EE29	1	4	2	2	0	0	2	0	0	2	0	0	2	0	0	2	0	0	2	0	0	2	0	0	1	8	8	5	4	8	4	7	7	9	3	6	2	6	6	2	7	7	6	6	6	3	5	8	5
EE30	2	4	2	2	0	0	0	2	0	2	0	0	0	2	0	2	0	0	2	0	0	0	2	0	1	9	5	1	1	9	5	5	5	9	1	5	5	5	5	5	1	9	5	5	5	5	1	9	5
EE31	2	4	2	2	0	0	1	2	0	2	0	0	1	2	0	2	0	0	1	2	0	1	2	0	2	7	7	2	7	8	2	7	7	8	3	3	3	7	7	3	7	7	2	7	8	3	7	8	5
EE32	2	4	2	2	1	0	1	1	2	2	1	0	2	1	1	1	2	1	1	2	1	0	1	2	1	8	8	8	8	8	5	2	8	9	5	5	6	8	8	6	8	8	7	6	6	6	6	8	8
EE33	1	4	4	2	1	1	2	1	1	2	1	1	2	1	1	2	1	1	2	1	1	2	1	1	3	7	7	3	1	7	3	3	7	7	3	3	2	7	7	2	7	7	2	2	2	5	5	5	7
EE34	1	4	2	2	0	0	2	0	0	2	0	0	2	1	0	2	1	0	1	2	1	1	2	1	5	9	9	3	5	9	6	6	9	9	6	9	9	9	9	9	9	9	7	9	9	9	9	9	9
EE35	1	3	2	2	1	0	2	0	0	2	1	1	1	2	0	2	1	1	2	0	0	2	1	1	3	7	8	6	3	7	4	3	6	7	3	5	4	5	7	5	7	7	5	6	7	5	3	7	6
EE36	2	8	2	2	0	0	0	2	0	2	0	0	2	1	0	2	0	0	2	0	0	0	2	0	9	5	5	9	1	7	9	3	9	9	1	6	5	7	7	5	9	9	9	3	5	7	3	9	8
EE37	1	6	2	2	0	0	0	0	2	0	2	0	2	0	0	0	2	0	2	0	0	0	0	2	3	9	9	1	1	9	5	4	9	9	1	4	4	7	7	4	9	9	1	4	6	1	1	9	6
EE38	1	3	2	2	0	0	0	2	0	2	0	0	2	1	0	0	2	0	2	1	1	0	1	2	1	7	5	9	2	7	6	2	5	9	6	6	3	7	8	4	6	8	7	3	5	4	8	6	4
EE39	1	4	2	2	0	0	2	1	1	2	1	1	0	1	2	0	1	2	0	1	2	0	1	2	3	6	7	8	7	2	3	5	7	8	2	6	3	6	6	3	7	7	3	6	8	4	2	7	7
EE40	1	4	2	1	1	0	1	1	0	1	1	0	0	1	1	1	1	0	0	1	1	0	2	0	1	5	9	7	2	5	3	6	7	7	5	6	4	9	7	2	9	6	4	9	7	3	1	9	7
EE41	1	6	2	2	1	0	2	0	1	2	0	0	0	1	2	0	1	2	2	0	1	0	1	2	4	8	8	3	6	9	6	7	7	9	3	6	4	8	7	6	8	8	7	7	7	7	7	8	8
EE42	1	3	2	0	2	0	0	2	0	2	0	0	0	2	0	0	2	0	0	2	0	0	2	0	3	8	8	8	7	6	7	7	7	9	7	8	7	8	8	6	7	8	7	9	9	7	9	9	8
EE43	1	3	2	2	1	0	2	1	1	2	1	0	2	1	1	2	1	0	2	1	1	2	1	0	2	5	5	6	6	8	3	5	8	8	5	8	6	6	8	3	5	8	8	5	6	3	4	7	3
EE44	2	6	3	0	1	2	0	1	2	1	0	2	0	1	2	0	1	2	0	1	2	0	1	2	1	4	7	1	6	8	4	2	8	7	3	8	4	7	7	2	7	7	3	7	7	2	3	8	3
EE45	1	3	2	2	1	0	2	1	1	2	1	0	2	1	1	2	1	0	2	1	1	1	2	1	4	6	6	5	6	8	4	6	7	9	3	6	5	5	7	5	7	7	4	8	8	6	5	7	5
EE46	1	3	2	2	1	0	2	0	0	0	2	0	2	1	1	0	2	0	0	2	0	1	0	2	1	8	8	9	1	7	4	5	7	8	2	7	3	7	8	5	2	7	6	3	8	2	1	4	5
EE47	1	3	2	1	2	1	0	2	1	2	0	0	0	2	1	2	0	0	0	2	1	0	2	1	9	9	9	5	5	9	7	9	5	9	6	9	6	9	9	6	9	9	9	9	9	6	7	9	6
EE48	1	3	2	2	1	0	2	1	0	2	1	1	2	1	0	0	2	1	2	0	0	0	2	1	7	8	8	3	5	8	4	3	7	9	3	6	8	9	9	4	6	6	8	9	9	3	7	8	2
EE49	1	3	2	2	0	0	2	0	0	2	0	0	2	0	0	2	0	0	2	0	0	2	0	0	1	9	8	2	9	9	2	8	8	9	2	6	2	9	9	1	9	9	6	4	4	2	8	9	8
EE50	2	6	3	2	0	0	0	2	0	2	0	0	2	0	0	2	0	0	0	2	0	0	2	0	4	3	3	6	1	9	6	3	6	9	4	7	6	8	2	7	9	8	7	7	9	6	5	8	4
EE51	1	4	3	1	2	1	2	0	0	1	2	1	1	1	2	1	2	1	2	1	1	0	2	0	2	5	5	8	3	5	5	5	8	9	3	6	2	8	7	6	8	8	3	7	7	5	4	6	7
EE52	2	3	3	2	0	0	0	2	0	2	0	0	0	0	2	2	0	0	0	2	0	0	2	0	999	999	999	1	9	9	3	9	9	6	3	3	3	8	8	4	9	9	5	5	5	4	8	8	2
EE53	1	3	2	1	2	0	2	1	0	2	1	0	2	1	0	2	1	0	2	1	0	2	1	0	3	7	9	3	7	9	5	5	5	2	6	9	3	8	9	3	7	8	6	7	9	4	7	9	4
EE54	1	3	2	2	0	0	0	2	1	2	1	1	0	1	2	0	1	2	0	1	2	0	1	2	3	8	8	3	3	3	7	7	7	8	5	7	3	8	8	3	8	8	3	8	8	3	8	8	3
EE55	2	6	2	2	1	1	1	1	2	0	2	1	0	1	2	2	1	1	0	1	2	0	1	2	1	6	9	2	7	9	6	8	3	9	5	7	5	8	8	5	8	8	7	8	8	5	7	8	4
EE56	1	3	2	2	1	0	1	2	0	2	1	0	2	1	0	1	2	0	1	2	0	1	2	0	5	5	5	5	5	5	5	5	5	5	5	5	5	5	5	5	5	5	5	5	5	5	5	5	5
EE57	2	6	1	2	0	0	0	2	0	2	0	0	2	0	0	2	0	0	2	0	0	0	2	0	1	7	7	1	7	9	3	7	9	9	3	5	4	7	7	4	9	9	4	9	9	4	7	9	6
EE58	1	1	3	2	1	1	1	1	2	2	1	1	1	1	2	1	1	2	1	1	2	1	1	2	2	5	5	8	1	9	5	5	8	7	5	7	3	6	7	5	7	8	4	5	7	3	4	9	3
EE59	1	6	1	2	0	0	1	2	1	2	1	0	2	1	1	1	2	1	2	1	0	0	1	2	2	9	9	1	1	9	6	3	9	9	1	8	3	9	9	4	9	9	7	9	9	3	2	9	4
EE60	1	5	2	2	0	0	2	0	0	2	0	0	2	0	0	2	0	0	2	0	0	2	0	0	1	9	9	1	1	9	9	6	2	9	4	6	6	9	8	9	9	9	7	9	9	5	7	9	7
EE61	1	3	3	0	2	1	2	0	0	2	0	0	2	1	0	0	2	1	2	0	0	0	1	1	2	7	6	8	2	6	4	3	8	8	3	7	3	7	7	4	9	9	4	9	9	4	6	9	6
EE62	1	3	2	2	1	0	0	1	2	2	1	0	1	1	2	1	2	1	1	0	2	0	1	2	3	5	5	5	1	9	5	1	8	9	1	6	1	8	6	3	9	9	3	8	8	1	1	8	1
EE63	1	3	2	2	1	0	0	1	2	2	1	0	0	1	2	2	1	0	0	1	2	0	1	2	3	5	7	1	1	9	1	6	9	9	1	7	2	4	9	5	7	9	5	5	9	1	9	9	1
EE64	1	3	3	2	0	0	2	0	0	2	0	0	2	0	0	2	0	0	2	0	0	0	2	0	1	9	5	9	1	5	9	5	9	9	1	5	1	5	5	1	9	9	5	9	9	5	5	5	7
EE65	1	6	1	2	1	0	1	2	0	2	1	0	1	2	0	2	1	0	2	1	0	1	2	0	2	8	8	7	2	8	6	4	5	9	3	6	2	9	5	3	9	9	6	9	9	4	9	9	7
EE66	2	3	2	1	2	0	1	2	0	1	2	0	0	2	1	0	2	1	0	2	1	0	2	1	1	8	8	9	3	3	3	6	8	9	2	4	2	8	8	3	6	7	8	8	8	2	7	7	2
EE67	1	8	1	2	0	0	0	0	2	0	2	0	0	0	2	2	0	0	0	2	0	0	0	2	1	8	9	9	1	5	1	5	9	9	3	7	2	8	9	1	8	9	2	5	8	1	5	9	1
EE68	1	3	4	2	0	0	0	1	1	2	0	0	2	0	0	1	1	0	2	0	0	0	1	1	6	8	8	8	6	7	5	7	8	8	6	7	7	8	8	6	8	8	7	8	8	7	7	8	6
EE69	1	3	3	2	0	0	2	0	0	2	0	0	2	0	0	2	0	0	2	0	0	2	0	0	5	9	8	7	1	9	7	7	7	9	1	6	5	7	7	5	8	7	5	7	7	5	1	7	5
EE70	2	6	1	2	0	0	0	2	0	2	0	0	0	2	0	2	0	0	0	2	0	0	2	0	4	9	9	9	9	9	6	8	8	9	4	7	5	9	9	5	9	9	6	9	9	4	7	7	5
EE71	1	3	3	2	0	0	0	2	0	2	0	0	2	0	0	0	2	0	0	2	0	0	2	0	2	8	8	7	2	5	8	8	8	8	2	3	3	8	8	4	8	8	5	6	6	3	2	7	8
EE72	2	1	2	2	0	1	0	2	1	2	0	1	0	2	1	0	2	1	0	2	1	0	2	1	8	3	3	5	7	9	1	8	9	9	1	7	1	9	9	1	9	9	7	9	9	2	6	9	3
CT1	1	10	1	1	1	2	2	1	1	2	0	0	2	0	1	0	2	0	2	0	0	1	1	2	1	7	7	9	5	7	9	9	9	9	6	7	4	8	7	4	7	7	5	7	7	6	6	6	7
CT2	1	3	4	2	0	0	2	0	0	2	0	0	2	0	0	2	0	0	2	0	0	2	0	0	1	5	7	3	7	5	3	7	5	9	3	5	3	7	5	3	7	5	3	4	4	3	7	5	3
CT3	2	9	1	2	0	0	2	0	0	2	0	0	2	0	0	2	0	0	2	0	0	2	0	0	4	8	8	9	2	3	8	4	4	9	1	2	5	8	8	5	7	6	5	7	7	3	7	8	7
CT4	2	9	1	2	0	0	2	0	0	2	0	0	2	0	0	2	0	0	2	0	0	2	0	0	1	5	5	9	1	1	9	1	9	9	1	1	5	8	8	5	9	9	9	1	1	1	6	9	2
CT5	2	9	1	1	2	0	1	2	0	2	1	0	0	2	0	0	2	0	0	2	0	0	2	0	1	9	8	5	7	1	2	7	8	9	1	6	3	9	8	1	9	8	1	9	7	4	7	1	2
CT6	2	2	2	2	1	0	1	2	1	2	0	0	0	1	2	2	0	0	2	0	0	2	0	0	3	7	9	3	8	9	4	9	9	9	2	3	2	9	9	1	9	9	4	9	9	4	7	9	2
CT7	1	4	2	2	0	0	2	0	0	2	0	0	2	0	0	2	0	0	2	0	0	2	0	0	6	1	4	6	9	9	7	9	9	9	1	1	5	9	5	2	9	9	9	3	3	5	5	5	9
CT8	1	4	2	2	0	0	2	0	0	2	0	0	2	1	0	2	1	0	2	0	0	2	1	1	6	9	9	9	4	9	8	9	9	9	6	7	8	9	9	7	8	8	8	8	8	7	7	8	9
CT9	1	3	2	2	0	0	2	0	0	2	0	0	2	0	0	2	0	0	2	0	0	2	0	0	1	2	2	9	2	3	6	2	6	9	2	6	1	9	9	1	9	9	8	8	8	6	6	6	9
CT10	1	4	3	2	1	0	1	2	0	2	1	0	2	1	0	1	2	0	2	0	0	0	1	2	4	8	8	3	2	7	5	7	8	8	6	7	5	7	7	5	7	7	6	8	8	6	8	8	7
CT11	2	4	2	2	0	0	0	2	0	2	0	0	2	1	0	2	0	0	2	0	0	2	0	0	6	5	5	3	3	5	3	3	5	5	3	5	3	6	6	3	5	5	6	5	5	4	6	6	5
CT12	1	2	3	2	1	1	0	1	2	0	2	1	2	1	1	0	2	1	1	1	2	0	1	2	1	8	5	1	8	9	3	5	6	8	3	5	1	8	5	2	8	8	2	5	7	2	5	7	3
CT13	1	2	4	2	0	0	0	2	0	2	0	0	0	2	0	2	0	0	0	2	0	0	0	2	2	8	5	5	2	8	4	6	8	7	5	5	3	7	7	4	7	7	4	8	7	3	3	8	4
CT14	1	3	2	2	0	0	2	1	1	2	1	0	2	0	0	2	1	1	2	0	0	2	1	1	5	8	7	9	4	4	7	4	6	9	1	1	8	7	5	7	5	8	7	5	6	6	4	6	7
CT15	2	8	2	2	0	0	2	0	0	2	0	0	2	0	0	0	2	0	2	0	0	0	2	0	4	6	6	5	3	6	3	3	5	8	3	5	3	7	7	3	7	7	6	5	6	2	4	6	2
CT16	1	3	3	2	0	0	2	0	0	2	0	0	2	0	0	0	2	0	2	0	0	2	0	0	1	9	9	3	3	3	5	9	9	9	4	4	4	9	9	9	9	9	8	8	8	5	9	9	5
CT17	2	5	4	2	0	0	1	0	2	2	0	0	1	0	2	2	0	0	1	0	2	1	0	2	2	9	9	1	9	9	1	1	9	8	1	8	3	6	7	3	8	8	2	6	7	2	3	7	1
CT18	1	2	3	2	0	0	0	0	2	2	1	0	0	1	1	2	1	0	2	1	0	0	0	2	3	6	6	3	1	7	4	2	8	8	3	2	2	5	6	2	7	8	3	6	7	3	6	7	3
CT19	1	2	3	1	2	0	1	2	0	2	1	0	1	2	0	2	1	0	2	1	0	1	2	0	1	8	6	9	2	6	8	7	7	9	3	4	4	9	9	4	9	8	7	5	5	3	9	5	8
CT20	2	2	3	0	1	1	2	0	1	2	0	0	0	1	2	0	1	2	0	2	0	0	2	1	1	5	5	9	4	1	1	9	9	9	5	5	5	9	7	3	9	5	5	9	9	5	5	9	5
CT21	2	8	1	1	1	2	1	2	1	1	1	2	1	1	2	1	2	1	2	1	1	1	1	2	3	8	8	8	2	8	8	5	7	9	1	7	5	8	7	5	8	8	7	8	8	7	4	7	8
CT22	2	7	1	2	0	0	0	1	2	2	1	0	2	0	0	0	0	2	0	0	2	0	1	2	3	7	7	3	1	9	2	7	7	9	2	6	3	8	9	3	5	9	3	7	7	3	4	9	6
CT23	2	3	3	2	0	0	1	0	2	2	1	0	2	0	0	0	1	1	0	1	2	0	1	2	2	9	9	9	1	7	6	6	7	9	1	8	8	9	9	6	9	9	7	5	8	3	1	9	7
CT24	2	1	1	0	2	0	0	0	2	2	0	0	2	0	0	0	2	0	0	0	2	0	0	2	7	5	3	6	5	5	9	6	2	9	4	2	8	3	3	7	2	5	7	2	1	9	2	1	8
CT25	2	5	2	2	1	1	1	2	1	2	0	1	1	2	1	1	1	0	2	0	1	0	2	0	5	9	9	6	4	9	7	4	9	9	5	7	9	9	9	7	9	9	9	9	9	5	5	8	9
CT26	2	6	3	2	0	0	1	0	2	2	0	0	2	0	0	2	0	0	2	0	0	1	0	2	6	2	6	9	1	6	9	7	7	9	1	7	9	9	9	2	4	7	9	9	9	3	7	9	4
CT27	1	5	2	2	1	1	1	1	2	2	0	0	2	0	1	2	1	0	2	1	0	0	1	2	3	9	9	7	2	9	2	5	8	8	2	5	5	7	7	5	7	7	5	7	8	5	6	8	8
CT28	1	5	2	2	1	0	2	0	0	2	0	0	2	0	1	1	2	0	2	0	0	0	1	2	1	1	1	6	1	8	5	4	7	8	5	7	6	7	7	6	7	7	4	4	6	4	3	6	8
CT29	1	3	2	2	0	0	2	1	0	2	1	0	2	0	0	2	1	0	2	0	0	1	2	0	1	5	5	9	1	9	9	9	9	9	1	5	5	9	9	5	9	9	9	9	9	9	4	9	9
CT30	1	5	1	2	0	0	2	0	0	2	0	0	2	0	0	2	0	0	2	0	0	2	0	0	9	9	7	6	6	6	7	6	6	8	8	8	9	9	9	8	6	6	9	7	7	8	7	7	6
CT31	1	2	3	2	0	0	0	2	0	2	0	0	2	0	0	2	0	0	2	0	0	0	2	0	4	6	5	5	5	5	5	5	5	4	5	6	4	5	5	4	5	5	3	5	5	4	5	6	4
CT32	1	3	2	1	1	0	0	2	0	2	0	0	2	0	0	1	1	0	0	2	0	0	0	2	5	7	7	6	6	7	6	6	7	9	6	7	5	9	9	5	9	9	4	9	9	4	9	9	9
CT33	1	3	2	1	0	2	1	0	2	1	0	2	1	0	2	1	0	2	1	0	2	1	0	2	2	7	9	2	7	9	2	7	9	3	7	9	3	8	9	3	7	9	4	7	9	2	7	9	3
CT34	1	3	3	2	0	0	2	0	0	2	0	0	2	0	0	2	0	0	2	0	0	2	0	0	5	7	7	5	7	7	5	5	5	8	4	4	5	5	5	5	7	7	6	6	6	5	5	5	5
CT35	1	9	3	2	0	0	2	1	0	2	0	0	1	2	0	2	0	0	2	0	0	2	0	0	4	8	6	9	5	6	7	6	7	9	5	4	5	7	5	8	6	5	8	6	5	7	6	7	7
CT36	1	8	3	2	1	0	2	1	1	2	1	0	2	1	0	1	1	2	2	1	0	1	1	2	1	9	9	1	1	9	1	1	9	9	1	3	1	1	9	1	1	9	9	1	9	1	1	9	9
CT37	1	7	1	2	1	0	0	2	1	2	0	0	0	2	1	0	2	1	0	1	2	0	1	2	1	8	8	4	2	9	3	5	7	8	2	8	4	6	9	2	7	9	2	5	9	2	5	9	5
CT38	1	7	1	2	0	0	0	2	0	0	2	0	2	0	0	2	0	0	0	2	0	0	2	0	1	9	9	9	5	8	5	7	7	9	5	5	5	9	9	5	9	9	9	9	9	5	9	9	5
CT39	1	7	1	2	0	0	0	2	1	2	0	0	0	2	1	2	0	0	0	2	0	0	2	1	2	9	9	1	1	9	5	5	9	9	3	5	3	9	9	3	9	9	5	9	9	3	3	9	1
CT40	2	7	1	2	0	0	2	0	0	0	2	0	0	2	0	0	2	0	0	2	0	0	2	1	3	7	8	4	7	8	7	9	8	8	6	7	3	6	7	3	7	7	5	8	8	5	8	8	7
CT41	1	7	1	2	0	0	0	2	1	2	0	0	2	1	0	0	2	1	0	2	0	0	2	1	1	9	9	9	1	9	5	2	8	9	2	3	6	7	7	2	7	7	7	5	6	3	7	8	7
CT42	1	7	1	1	2	1	0	1	2	1	2	1	0	2	1	0	1	2	0	1	2	0	2	1	2	6	8	7	2	5	7	1	8	7	2	6	2	8	2	4	9	9	3	9	9	6	6	9	4
CT43	2	7	3	2	1	0	2	1	0	2	1	0	2	1	0	2	1	0	2	1	0	2	1	0	6	5	6	6	6	6	5	5	6	5	6	5	5	5	6	5	6	6	5	5	5	5	6	6	5
CT44	2	5	1	2	0	0	2	0	0	0	2	0	2	0	0	0	2	0	2	0	0	0	0	2	5	5	4	9	4	5	5	5	5	9	5	5	4	5	6	4	7	7	8	3	3	9	5	5	5
CT45	2	1	1	2	0	0	0	2	1	2	0	0	0	2	1	0	2	1	0	2	1	0	1	2	3	8	8	9	1	2	2	2	9	9	2	4	2	6	8	2	7	8	4	9	9	2	4	9	7
CT46	2	1	1	2	1	1	1	2	1	2	1	1	2	1	1	2	1	0	0	2	0	0	1	2	1	9	9	9	2	3	3	4	7	5	5	5	2	5	7	3	7	8	4	7	7	4	6	8	8
CT47	1	3	3	2	0	0	2	1	1	1	2	1	2	0	0	2	0	0	2	0	0	1	1	2	4	8	8	4	1	7	9	3	5	9	1	3	1	9	9	5	9	9	2	8	8	2	3	9	1
CT48	1	3	3	0	1	2	0	1	2	2	0	0	0	1	2	2	0	1	1	0	2	0	1	2	2	9	8	1	9	9	2	8	9	9	1	9	8	2	9	3	9	9	3	9	9	1	8	9	1
CT49	1	3	3	2	0	0	2	1	0	2	0	0	2	1	0	2	0	0	2	0	0	0	2	0	1	9	9	9	1	5	7	1	8	9	2	6	7	8	8	9	9	9	2	9	9	3	2	9	9
CT50	1	3	3	2	0	0	2	0	0	2	0	0	2	0	0	2	0	0	2	0	0	2	0	0	3	7	7	4	7	9	3	6	6	9	1	4	2	8	7	3	9	9	8	7	5	3	5	7	7
CT51	1	3	2	2	0	0	0	0	2	2	0	0	0	2	0	2	0	0	2	0	0	0	0	2	7	4	4	8	8	6	8	7	5	8	5	6	8	5	5	7	7	5	8	7	6	8	3	6	9
CT52	2	7	2	2	0	0	2	0	0	2	0	0	2	0	0	2	0	0	2	0	0	2	0	0	1	8	8	4	4	8	4	7	8	8	2	5	2	5	3	2	8	8	2	5	5	2	5	5	5
CT53	2	6	3	2	0	0	0	2	0	2	0	0	0	0	2	2	0	0	0	0	2	0	0	2	3	7	7	8	5	5	4	8	8	9	3	3	3	7	7	5	6	6	6	3	4	2	4	8	7
CT54	1	3	1	2	0	0	0	2	0	0	2	0	0	2	0	2	0	0	0	2	0	2	0	0	2	3	5	3	1	9	3	4	6	7	2	5	3	7	7	3	7	7	6	8	8	3	7	8	6
CT55	1	3	1	2	0	0	0	1	1	2	0	0	0	1	1	0	1	1	0	1	1	0	1	1	3	8	8	7	4	6	7	5	5	8	4	5	3	7	7	6	7	7	4	7	7	4	7	7	5
CT56	1	1	1	2	0	0	2	0	0	2	0	0	2	0	0	2	0	0	2	0	0	2	0	0	8	7	6	8	4	4	7	5	5	7	6	5	7	6	5	7	6	5	7	3	3	8	5	5	8
CT57	1	3	1	0	0	2	0	0	2	0	0	2	2	0	1	0	0	2	0	0	2	0	0	2	3	7	8	9	3	7	6	7	9	9	3	7	5	4	9	5	8	9	5	7	9	2	2	9	9
CT58	1	3	1	2	1	0	1	0	2	2	1	0	2	0	1	2	1	0	2	1	0	1	0	2	5	9	8	9	1	3	8	5	6	9	3	5	4	7	8	5	8	8	7	8	8	3	4	7	9
CT59	2	6	3	2	1	0	0	1	2	2	0	0	0	1	2	0	0	2	0	1	2	0	2	1	1	9	7	1	2	9	1	1	9	9	2	8	1	9	8	2	9	9	6	6	8	1	3	9	1
CT60	1	7	2	2	0	0	0	1	2	2	0	0	0	1	1	0	2	0	2	0	0	2	0	0	2	8	8	8	3	6	8	3	6	4	3	6	7	8	7	4	8	7	3	6	7	4	7	7	7
CT61	1	3	2	0	2	0	2	0	0	0	2	0	0	2	0	0	2	0	2	0	0	0	2	0	7	6	6	5	5	5	8	7	7	8	8	8	5	7	5	5	8	6	5	8	7	7	7	7	7
CT62	2	3	2	2	0	0	2	0	0	2	0	0	2	0	0	2	0	0	2	0	0	2	0	0	8	2	2	2	2	2	8	8	8	9	2	2	3	7	7	5	8	8	2	2	2	2	8	8	7
CT63	1	3	1	2	1	1	2	0	0	2	1	1	2	0	0	2	1	1	2	0	0	2	0	0	5	9	9	5	5	5	7	3	9	9	1	5	3	7	8	4	9	9	9	7	8	3	1	6	9
CT64	1	3	1	2	0	0	2	0	0	2	0	0	2	0	0	2	0	0	2	0	0	2	0	0	5	7	7	5	5	7	4	6	6	6	4	4	4	4	4	4	6	6	6	8	8	6	8	8	6
CT65	1	4	1	0	2	0	0	2	0	0	2	0	0	2	0	0	2	0	0	2	0	0	2	0	5	9	9	4	5	9	6	9	9	9	3	3	5	9	9	5	9	9	9	9	9	6	9	9	7
CT66	1	3	3	2	0	0	2	0	0	1	1	1	2	0	0	1	2	1	2	0	0	1	2	1	4	9	9	9	3	3	5	5	9	9	1	3	3	6	8	3	6	9	9	6	9	3	7	9	9
CT67	2	6	1	2	0	0	2	0	0	2	0	0	0	2	0	2	0	0	2	0	0	0	2	0	3	8	8	1	2	8	7	5	5	9	1	1	3	7	7	6	9	9	4	7	6	4	7	8	4
CT68	2	6	1	2	0	0	0	2	0	2	0	0	0	2	0	2	0	0	0	2	0	0	2	0	4	7	7	3	6	7	7	7	7	8	4	6	7	7	7	6	7	8	5	7	7	5	7	8	6
CT69	2	6	1	2	0	0	2	0	0	1	2	1	2	0	0	1	2	1	2	0	0	2	0	0	1	9	9	5	5	5	7	4	5	8	3	5	5	7	7	5	7	7	5	5	5	5	5	5	6
CT70	2	1	4	2	0	0	2	0	0	2	0	0	2	0	0	0	2	0	2	0	0	2	0	0	5	1	1	1	1	1	1	1	1	1	1	1	5	5	5	7	7	7	8	8	8	4	4	4	1
CT71	2	3	4	2	0	0	0	2	0	2	0	0	0	2	0	2	0	0	2	0	0	0	2	0	1	9	9	7	2	9	2	3	5	9	1	7	2	8	8	2	7	7	7	6	6	5	7	7	4
CT72	1	3	1	2	0	0	2	0	0	2	0	0	2	0	0	2	0	0	2	0	0	2	0	0	5	5	4	6	4	5	5	4	3	6	5	7	5	5	3	5	5	5	4	4	6	5	6	4	3
CT73	1	7	999	2	0	0	2	0	0	0	2	0	0	2	0	2	0	0	2	0	0	0	2	0	5	5	5	5	4	5	5	4	6	6	6	6	7	8	5	4	5	7	2	5	8	6	4	5	3
CT74	2	1	3	2	0	0	1	2	1	1	1	0	0	2	1	2	0	0	1	2	1	0	2	1	2	8	8	8	2	8	2	2	8	9	2	5	5	6	8	5	9	9	5	5	7	5	5	8	8
CT75	1	2	1	2	0	0	2	0	0	2	0	0	2	0	0	2	0	0	2	0	0	2	0	0	2	8	8	5	2	8	6	3	7	9	1	3	2	7	7	1	8	8	4	6	6	2	2	7	5
CT76	1	2	1	0	2	0	0	2	0	0	2	0	0	2	0	0	2	0	0	2	0	0	2	0	8	5	7	6	9	4	5	8	9	8	6	7	3	8	7	3	7	8	5	7	7	2	7	6	1
CT77	1	2	1	0	2	0	0	2	0	0	2	0	0	2	0	0	2	0	0	2	0	0	2	0	1	7	7	1	3	9	9	5	9	9	1	9	1	7	7	1	9	9	1	9	9	1	9	9	1
CT78	1	3	4	2	0	0	2	0	0	2	0	0	2	0	0	2	0	0	2	0	0	1	1	0	3	7	8	2	3	8	6	7	7	8	4	3	4	8	7	7	3	3	7	8	8	6	4	3	8
CT79	1	3	4	2	0	0	2	0	0	2	0	0	2	0	0	2	0	0	2	0	0	2	0	0	7	6	7	6	5	7	6	7	7	5	7	6	7	7	6	6	7	6	7	5	7	5	5	6	7
CT80	2	1	4	2	0	0	999	999	999	999	999	999	999	999	999	2	0	0	999	999	999	999	999	999	9	1	9	4	1	5	6	4	5	2	1	3	6	4	5	5	3	3	6	4	4	6	5	6	7
CT81	1	7	1	2	0	0	0	0	2	2	1	0	0	2	0	0	0	2	2	0	0	0	0	2	3	4	7	9	5	7	7	7	7	9	5	7	5	7	7	5	7	7	5	7	7	6	3	7	5
CT82	1	4	3	2	0	0	0	2	0	2	0	0	2	0	0	0	2	0	2	0	0	0	2	0	1	7	5	5	7	9	3	5	7	9	1	3	3	7	5	1	7	9	5	5	5	3	7	9	3
CT83	1	4	2	2	0	0	0	2	0	2	0	0	0	0	2	0	2	0	0	2	0	0	0	2	1	7	7	8	2	8	6	3	6	9	3	3	2	7	7	2	8	8	4	7	7	3	3	7	4
CT84	1	3	2	0	0	2	0	2	0	2	0	0	0	2	0	2	0	0	0	2	0	0	2	0	5	9	8	8	2	5	8	7	7	8	2	5	5	9	7	6	9	7	7	9	7	8	5	6	9
CT85	1	5	3	2	0	0	0	1	2	2	1	1	2	0	0	0	1	2	0	2	1	0	1	2	1	6	6	4	1	8	4	6	8	8	1	2	2	6	6	2	8	8	2	6	8	1	3	8	6
CT86	1	5	3	1	1	0	1	1	0	1	1	0	1	1	0	1	1	0	1	1	0	1	1	0	4	7	6	8	2	6	4	4	7	8	2	6	3	7	7	5	7	7	6	3	7	4	4	7	7
CT87	1	4	1	2	0	0	0	0	2	2	0	0	0	0	2	0	2	0	0	2	0	0	0	2	3	8	8	3	7	8	5	4	7	8	4	5	4	7	7	3	7	8	6	7	7	4	6	8	5
CT88	1	3	2	2	0	0	2	0	0	2	0	0	0	2	0	0	2	0	0	2	0	0	2	0	7	9	9	8	5	9	8	7	7	9	5	7	6	9	8	6	7	8	8	8	8	7	7	8	9
CT89	1	3	2	2	0	0	2	0	0	2	0	0	2	0	0	2	0	0	2	0	0	2	0	0	5	3	3	9	1	3	5	3	3	9	1	3	3	5	3	5	7	6	7	9	9	7	1	8	7
CT90	1	3	3	2	0	0	0	0	2	2	0	0	2	0	0	2	0	0	2	0	0	0	0	2	5	5	5	9	3	6	1	3	9	9	1	1	1	5	9	3	9	9	3	9	9	1	9	9	1
CT91	2	1	1	2	0	0	2	0	0	2	0	0	2	0	0	2	0	0	2	0	0	2	0	0	1	7	8	1	7	8	4	8	8	9	6	6	1	9	9	3	8	9	5	8	9	4	8	9	5
CT92	2	1	1	2	0	0	2	0	0	2	0	0	2	0	0	2	0	0	2	0	0	0	1	1	1	6	5	1	3	9	2	2	9	8	2	2	5	8	5	6	9	8	6	8	8	4	8	8	4
CT93	2	1	1	2	0	0	2	0	0	2	0	0	2	0	0	2	0	0	2	0	0	0	0	2	7	5	4	5	5	9	5	3	9	9	2	6	2	8	9	3	4	8	6	7	9	3	4	8	3
CT94	2	8	3	2	1	1	0	1	2	2	0	0	0	1	2	0	2	0	0	0	2	0	0	2	2	7	9	9	1	9	2	2	9	9	2	6	2	5	9	2	4	7	2	5	8	1	3	8	1
CT95	1	6	1	2	0	0	2	0	0	2	0	0	2	0	0	2	0	0	2	0	0	2	0	0	3	7	8	6	2	7	6	5	7	8	4	5	6	5	5	4	8	7	7	7	7	6	6	7	5
CT96	2	5	1	2	0	0	0	2	0	0	2	0	0	0	2	0	2	0	2	0	0	0	0	2	7	9	9	7	2	8	2	3	8	9	1	5	4	8	8	7	4	8	3	6	6	1	1	9	8
CT97	1	5	1	0	2	0	0	2	0	0	0	2	0	0	2	0	2	0	0	0	2	0	0	2	6	9	9	1	9	9	9	8	8	9	6	6	2	4	7	3	9	9	1	7	9	8	8	7	5
CT98	2	5	1	2	0	0	0	1	2	2	0	0	0	1	2	0	2	1	0	2	0	0	0	2	9	7	7	8	1	4	7	7	7	9	3	5	7	7	7	6	7	7	7	5	5	9	7	8	9
CT99	2	8	3	2	1	0	1	2	0	1	2	0	0	2	1	0	2	0	2	1	0	0	2	1	3	7	5	1	3	9	3	1	7	8	3	3	2	8	8	2	8	8	5	5	5	2	5	7	7
CT100	1	2	3	2	1	1	1	2	1	2	1	1	2	1	1	2	1	1	2	1	1	1	2	1	3	9	9	5	2	8	4	4	7	9	3	6	2	9	9	2	9	9	3	8	7	3	1	8	7
CT101	2	8	2	2	0	0	0	1	2	2	0	0	1	1	2	1	0	2	0	1	2	0	1	2	4	8	7	8	2	9	7	6	9	9	4	7	4	8	8	4	9	9	9	8	9	8	8	9	9
CT102	1	3	4	2	0	0	2	0	0	2	1	0	2	0	0	2	1	0	2	1	0	2	0	0	3	7	7	4	7	7	3	7	8	7	5	5	3	7	8	3	5	7	5	5	5	3	6	8	3
CT103	2	8	3	2	1	0	0	2	0	2	1	0	2	1	0	0	2	0	2	1	0	0	2	0	1	7	7	6	1	9	2	2	8	9	1	1	1	9	8	1	9	9	3	8	8	2	5	8	5
CT104	1	5	4	2	0	0	2	0	0	2	0	0	0	0	2	2	0	0	0	0	2	0	0	2	1	6	6	9	1	8	4	1	8	9	1	6	3	8	5	4	9	9	7	9	9	7	8	9	8
CT105	1	3	1	2	1	1	2	0	0	2	1	1	1	2	1	2	0	0	2	0	0	2	1	1	9	9	9	9	5	9	5	5	9	9	1	5	8	9	9	5	9	9	9	9	9	4	5	9	6
CT106	2	2	1	2	1	0	1	0	2	2	0	1	2	0	1	0	0	2	0	0	2	0	0	2	3	6	9	5	1	9	1	1	8	9	1	7	3	9	8	3	9	9	6	6	6	4	8	8	2
CT107	2	1	1	2	0	0	0	2	0	2	1	0	2	1	0	0	2	0	0	2	0	0	2	1	1	5	9	3	1	9	1	5	9	9	2	5	1	3	7	3	5	8	1	2	5	1	4	7	1
CT108	2	1	1	2	1	1	1	2	1	2	1	1	1	2	1	1	2	1	1	2	1	1	2	1	2	4	6	2	4	8	5	4	5	9	3	4	2	7	7	2	8	8	3	5	7	4	6	7	8
CT109	1	2	1	2	1	0	0	2	1	2	0	0	2	0	0	2	0	0	0	1	1	0	1	2	1	5	7	5	2	8	4	7	7	8	2	2	3	7	7	3	6	6	8	8	8	4	2	7	4
CT110	2	2	1	0	2	0	1	1	2	0	2	0	2	1	1	0	2	0	0	2	0	2	0	0	1	9	9	3	9	9	3	3	7	6	3	5	3	8	5	1	8	8	2	9	8	2	2	6	3
CT111	2	1	3	2	0	0	0	1	2	2	0	0	0	2	1	0	2	0	0	2	1	0	2	0	1	9	6	5	1	5	4	2	7	9	1	7	4	8	6	3	9	7	8	9	9	3	4	8	6
CT112	2	7	2	2	0	1	1	1	2	1	2	1	1	1	2	2	0	1	1	1	2	1	1	2	5	9	9	3	4	9	9	5	8	9	2	4	4	9	7	3	8	8	7	8	8	3	9	9	9
CT113	2	7	2	1	2	0	0	1	2	1	2	0	1	2	0	2	0	0	0	2	1	0	1	2	1	7	7	5	2	5	7	5	5	8	3	5	8	6	7	7	8	8	5	8	8	7	5	5	7
CT114	2	10	1	2	0	0	0	2	1	2	0	0	1	2	1	0	1	2	2	0	0	0	1	2	1	6	7	1	3	8	3	5	7	9	5	7	9	9	9	5	9	9	6	6	6	4	4	7	4
CT115	2	2	1	2	0	0	0	2	0	2	1	0	2	0	0	2	0	0	2	1	0	0	2	1	1	7	7	5	2	5	7	4	8	9	3	6	3	7	7	2	8	8	4	7	7	2	3	7	4
CT116	1	7	1	2	1	0	0	2	0	2	1	0	0	2	0	0	2	0	0	2	0	0	2	0	1	9	8	5	3	8	3	6	6	9	3	7	3	9	8	3	9	9	8	9	9	3	3	9	7
CT117	1	6	3	2	0	0	0	0	2	2	0	0	2	0	0	0	0	2	0	0	2	0	0	2	7	5	7	7	5	8	8	5	8	8	6	7	7	7	7	6	8	8	7	8	7	7	6	8	8
CT118	2	5	1	1	2	0	0	1	2	1	2	0	1	2	1	2	1	1	1	2	1	1	1	2	2	7	8	6	3	8	6	6	7	9	2	7	4	9	7	4	9	9	7	4	4	3	2	7	6
CT119	1	4	1	2	0	0	0	2	0	2	0	0	2	0	0	2	0	0	2	0	0	2	0	0	2	5	7	8	5	2	7	7	7	8	4	2	4	5	6	3	4	5	5	3	3	4	6	8	7
CT120	1	3	1	2	0	0	0	2	0	0	2	0	0	2	0	0	2	0	0	2	0	0	2	0	3	7	7	7	1	5	3	3	6	9	1	6	3	7	7	6	6	6	8	7	7	6	2	2	4
CT121	2	7	1	0	2	0	2	1	0	0	2	0	0	2	1	0	2	0	2	0	1	2	0	1	7	9	8	9	1	7	9	5	7	9	2	5	3	9	5	4	3	3	8	9	8	5	1	9	6
CT122	1	3	1	2	0	0	2	0	0	2	0	0	2	0	0	0	1	2	0	1	2	0	1	2	4	9	9	1	3	9	2	2	9	9	1	3	1	9	6	1	9	9	3	9	9	2	2	9	3
CT123	1	3	4	2	0	0	2	0	1	2	0	0	2	0	1	2	1	0	2	0	1	1	0	2	2	8	7	6	3	9	3	3	8	9	3	8	2	8	8	3	7	7	5	7	7	2	5	9	4
CT124	1	3	2	1	0	2	2	0	1	2	1	0	0	1	2	0	1	2	1	0	2	0	1	2	2	1	1	2	7	9	4	5	8	9	2	7	3	6	8	2	9	9	3	8	8	5	9	9	9
CT125	1	3	1	2	1	0	1	1	2	2	0	1	1	0	2	0	1	2	2	1	0	0	1	2	5	8	9	7	1	9	7	3	9	9	1	9	5	8	8	3	8	8	8	8	9	2	2	9	7
[truncated: 2 more columns]

## Sheet: Codebook
A_ID	Participant ID
A_1_gender	Gender	1: Male	2: Female
A_2_AP	College	1: Humanity	2: Sciences	3: Engineering	4: Electrical Engineering & Computer Science	5: Liberal Arts
		6: Business and Management	7: Medicine	8: Social Sciences	9: Bioscience & Biotechnology	10: Others	999: Missing
A_2_grade	School Year in College	1: Freshman	2: Sophomore	3: Junior	4: Senior
Preferability_Counseling Problems
B_1_1_FA	Life Transition_Traditional	0: Unselected	1: Selected	2: Selected and Marked as Most Appropriate			999: Missing
B_1_1_WEB	Life Transition_Internet
B_1_1_SL	Life Transition_SL
B_1_2_FA	Relationship_Traditional
B_1_2_WEB	Relationship_Internet
B_1_2_SL	Relationship_SL
B_1_3_FA	Academic Problems_Traditional
B_1_3_WEB	Academic Problems_Internet
B_1_3_SL	Academic Problems_SL
B_1_4_FA	Interpersonal Communication_Traditional
B_1_4_WEB	Interpersonal Communication_Internet
B_1_4_SL	Interpersonal Communication_SL
B_1_5_FA	Economic Hardship_Traditional
B_1_5_WEB	Economic Hardship_Internet
B_1_5_SL	Economic Hardship_SL
B_1_6_FA	Family Conflict_Traditional
B_1_6_WEB	Family Conflict_Internet
B_1_6_SL	Family Conflict_SL
B_1_7_FA	Gender Identity_Traditional
B_1_7_WEB	Gender Identity_Internet
B_1_7_SL	Gender Identity_SL
Relative strengths and weaknesses_Media Features
B_2_1_FA	Anonymity_Traditional	1 to 9: from Strongly Disagree to Strongly Agree					999: Missing
B_2_1_WEB	Anonymity_Internet
B_2_1_SL	Anonymity_SL
B_2_2_FA	Choice of appearance_Traditional
B_2_2_WEB	Choice of appearance_Internet
B_2_2_SL	Choice of appearance_SL
B_2_3_FA	Choice of counselors_Traditional
B_2_3_WEB	Choice of counselors_Internet
B_2_3_SL	Choice of counselors_SL
B_2_4_FA	Interactivity_Traditional
B_2_4_WEB	Interactivity_Internet
B_2_4_SL	Interactivity_SL
B_2_5_FA	Convenience in time_Traditional
B_2_5_WEB	Convenience in time_Internet
B_2_5_SL	Convenience in time_SL
B_2_6_FA	Convenience in place_Traditional
B_2_6_WEB	Convenience in place_Internet
B_2_6_SL	Convenience in place_SL
B_2_7_FA	Privacy of place_Traditional
B_2_7_WEB	Privacy of place_Internet
B_2_7_SL	Privacy of place_SL
B_2_8_FA	Diversity of counseling sites_Traditional
B_2_8_WEB	Diversity of counseling sites_Internet
B_2_8_SL	Diversity of counseling sites_SL
B_2_9_FA	Availability of counseling objects_Traditional
B_2_9_WEB	Availability of counseling objects_Internet
B_2_9_SL	Availability of counseling objects_SL
